# Supplementary material
Source: PubMed Central journal article supplement (PMC4741193)
Supplement: f-72-00129-sup1.pdf [file f-72-00129-sup1.pdf]

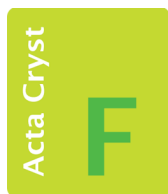

STRUCTURAL BIOLOGY  
COMMUNICATIONS

**Volume 72 (2016)**

**Supporting information for article:**

**Crystal structure of microtubule affinity-regulating kinase 4 catalytic domain  
in complex with a pyrazolopyrimidine inhibitor**

**John S. Sack, Mian Gao, Susan E. Kiefer, Joseph E. Myers, John A. Newitt, Sophie Wu and  
Chunhong Yan**

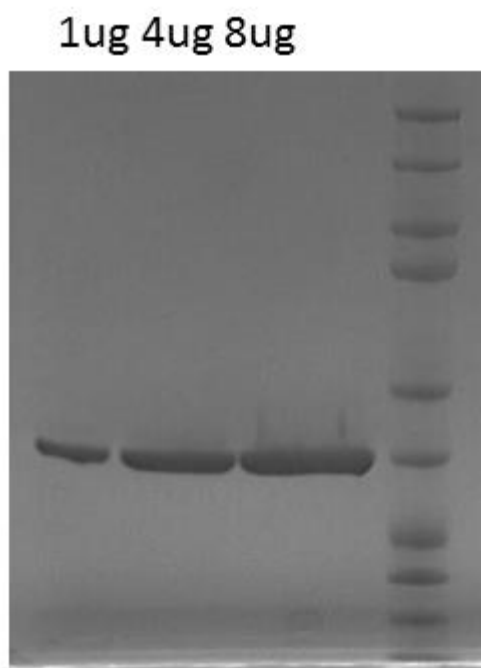

**Figure S1** SDS-PAGE analysis of purified MARK4

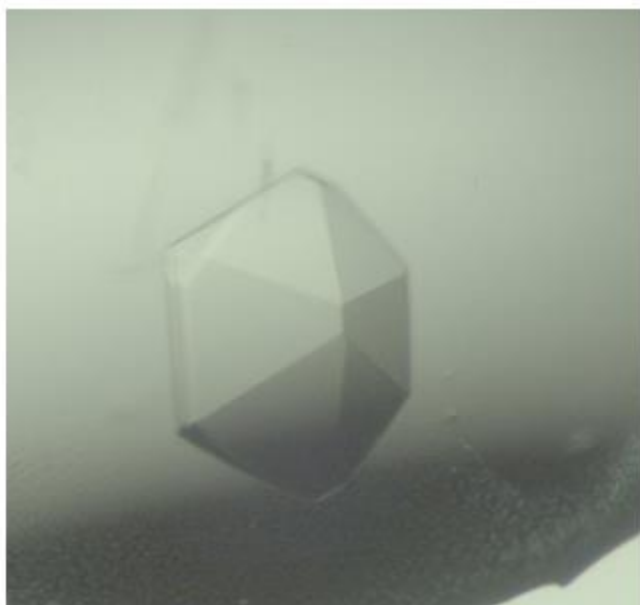

**Figure S2** Crystal of MARK4 in complex with Compound 1 grown in 20% (w/v) PEG 6000, 0.2M MgCl<sub>2</sub>, 0.1 M Tris, pH 8.5.
